# Supplementary material
Source: PubMed Central journal article supplement (PMC3986185)
Supplement: 1316510111_pnas.201316510SI.pdf [file 1316510111_pnas.201316510SI.pdf]

# Supporting Information

Ridderstad Wollberg et al. 10.1073/pnas.1316510111

## SI Materials and Methods

**Human Brain and Spinal Cord Tissue.** All human tissue studies were reviewed and approved by the appropriate ethical committee. Informed consent for donation of tissues was given by all patients or their next of kin. Tissue from multiple sclerosis (MS) patients and controls were acquired from the Netherlands Brain Bank as fresh frozen tissue blocks. Ten-micron sections were analyzed. Detection of hybridized probes used branched DNA/alkaline phosphatase/fast red-driven visualization. Precipitated and red punctuated dots indicate presence of target RNA molecule. Tissue sections were finally counterstained with Harris hematoxylin. For detection of lipid-filled phagocytes, cryosections were postfixed in formalin, stained with oil red O and finally counterstained with Mayer hematoxylin.

**Experimental Autoimmune Encephalomyelitis Induction in Dark Agouti Rats, Scoring, and Treatment.** All animal experimental procedures were performed in accordance with relevant guidelines and regulations provided by the Swedish Board of Agriculture. Each rat received an injection of 0.2 mL inoculum, containing 85–100  $\mu$ g of recombinant rat myelin oligodendrocyte glycoprotein (MOG)<sub>1-125</sub>. The score and body weight were monitored daily and treatment was blinded to the operator. AZD8797 was formulated in 30–35% (wt/wt) hydroxy-propyl-beta-cyclodextrin and administered s.c. through osmotic minipumps (Alzet) in 2  $\times$  7 d (39  $\mu$ mol/kg per day) or 2  $\times$  14 d (78  $\mu$ mol/kg per day). The plasma concentration of AZD8797 was analyzed twice from each animal (at pump exchange), and the limit of quantification was 64 nmol/L.

**Histopathological Evaluation of EAE.** Rats were perfused with phosphate-buffered 4% paraformaldehyde (pH 7.3), followed by immersion fixation in 4% paraformaldehyde overnight, and then transferred to PBS with 0.02% NaN<sub>3</sub>. IHC was performed following microwave treatment using the primary antibodies PGP 9.5 (Affinity Research; 1:1,000), ED1 (CD68; Serotec; 1:500), or Iba-1 (Wako Biochemicals; 1:500). The avidin–biotin complex system was used as the detection system, with 3,3'-diaminobenzidine as the chromogen. The slides were then digitized

using a Hamamatsu Nanozoomer slide scanner (20 $\times$  objective, bright field illumination with standard settings, and a mercury lamp illumination source). The digitized images of the stained tissues were visualized at medium to high resolution, using the Hamamatsu NDP View software, and scored semiquantitatively for histopathological lesions, using a four-grade scale. Spinal cord expression of Iba-1 and CD68 was semiquantified using a three- or four-grade scale, respectively.

**Evaluation of CX3CR1 mRNA, CD68 Protein Expression, and [<sup>3</sup>H]PK11195 Binding on Consecutive Rat Spinal Cord Sections.** IHC detection of CD68 (ED-1, Serotec) was performed on acetone fixed tissue sections.

For in situ hybridization, <sup>35</sup>S-labeled antisense and sense rat CX3CR1 <sup>35</sup>S-labeled cRNA probes (GenBank RN04808) were hybridized to the tissues over night at 60  $^{\circ}$ C, followed by high-stringency (0.1 $\times$  SSC; 70  $^{\circ}$ C) washes and RNase digestion. Detection of bound, radiolabeled cRNA probes was achieved by exposure to NTB-2 emulsion (Kodak) for 3 wk.

For receptor autoradiography [<sup>3</sup>H]PK11195 at 83.5 Ci/mmol (Perkin-Elmer) and unlabeled PK11195 (Tocris) were used. Tissue sections were incubated with 1 nM [<sup>3</sup>H]PK11195 with or without competing cold ligand for 60 min at room temperature, washed in 50 mM Tris (pH 7.4) at 1  $^{\circ}$ C, and dipped in cold deionized water. Tissue sections and tritium standards were exposed to imaging plates (Fuji BAS-TR2040) for 5 d and the processed with a FLA-7000 Image reader (Fujifilm). Each spinal cord section was outlined, and the intensity was measured over the entire section.

Photomicrographs of emulsion-coated slides in bright field were captured with a Sony DXC-S500 digital camera mounted on a Leica microscope. Digital images were imported into Adobe Photoshop CS 8.0, where they were adjusted to balance and optimize brightness, contrast, and sharpness. CD68 staining is presented as area fraction positive cells quantified with Image J software (National Institutes of Health), whereas [<sup>3</sup>H]PK11195 binding and CX3CR1 in situ hybridizations was quantified with Multi Gauge V3.0 software (Fujifilm).

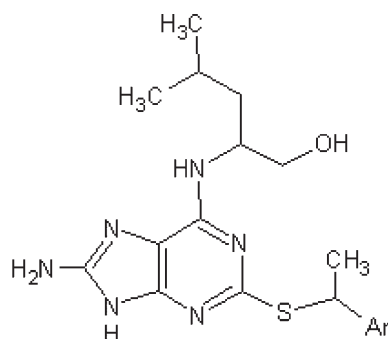

AZD8797

Fig. S1. Structural formula of the CX3CR1 inhibitor AZD8797.



### Distribution of rats into three treatment groups on day 17 post induction of EAE

100 rats induced  
64 rats with EAE on day 17

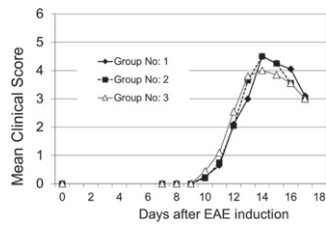

|            | Gr 1  | Gr 2 | Gr 3  |
|------------|-------|------|-------|
| Mean score | 3.1   | 3    | 3     |
| Mean DoO   | 12.05 | 12   | 11.75 |

| Score | Gr 1 | Gr 2 | Gr 3 | Sum |
|-------|------|------|------|-----|
| 6     | 2    | 2    | 1    | 5   |
| 5     | 3    | 3    | 3    | 9   |
| 4     | 2    | 1    | 3    | 6   |
| 3     | 4    | 4    | 4    | 12  |
| 2     | 6    | 7    | 6    | 19  |
| 1     | 3    | 3    | 3    | 9   |
|       | 20   | 20   | 20   |     |

Distribution of rats in different disease phases at onset of treatment

|     | ↑ | → | ↓  | ↑ R |
|-----|---|---|----|-----|
| gr1 | 1 | 4 | 15 |     |
| gr2 | 3 | 1 | 15 | 1   |
| gr3 | 3 | 0 | 16 | 1   |

Explanation: ↑ Score increasing  
→ Score stable  
↓ Remission  
↑ R Relapse

**Fig. S5.** Graphic illustration of the distribution of DA rats with EAE (at day 17 after induction) into three groups (with equal mean score and distribution of disease patterns). The groups then received either of three treatments (vehicle or high or low dose of AZD8797). Treatment was blinded for the experimentalists until termination of the study. (Upper Left) Mean clinical score of the three groups of rats from d6 to d17. (Upper Right) Mean score and mean day of onset (DoO) of the three groups of rats at d17. (Lower Left) Number of rats at each score (between 1–6) allocated to the different groups. (Lower Right) Number of rats in different disease phases (increasing score, stable score, remission, and relapse).

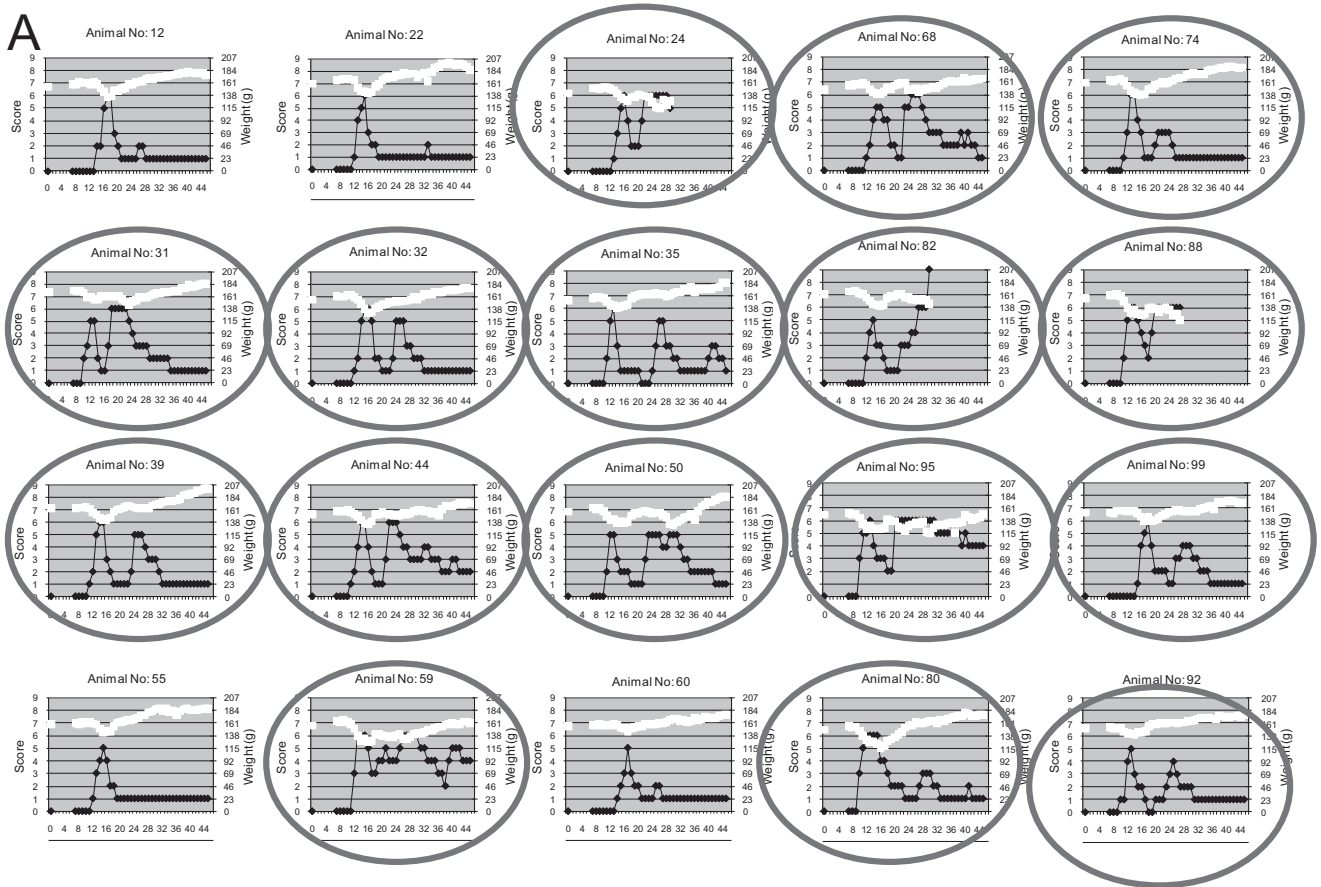

**Fig. S6.** (Continued)

B

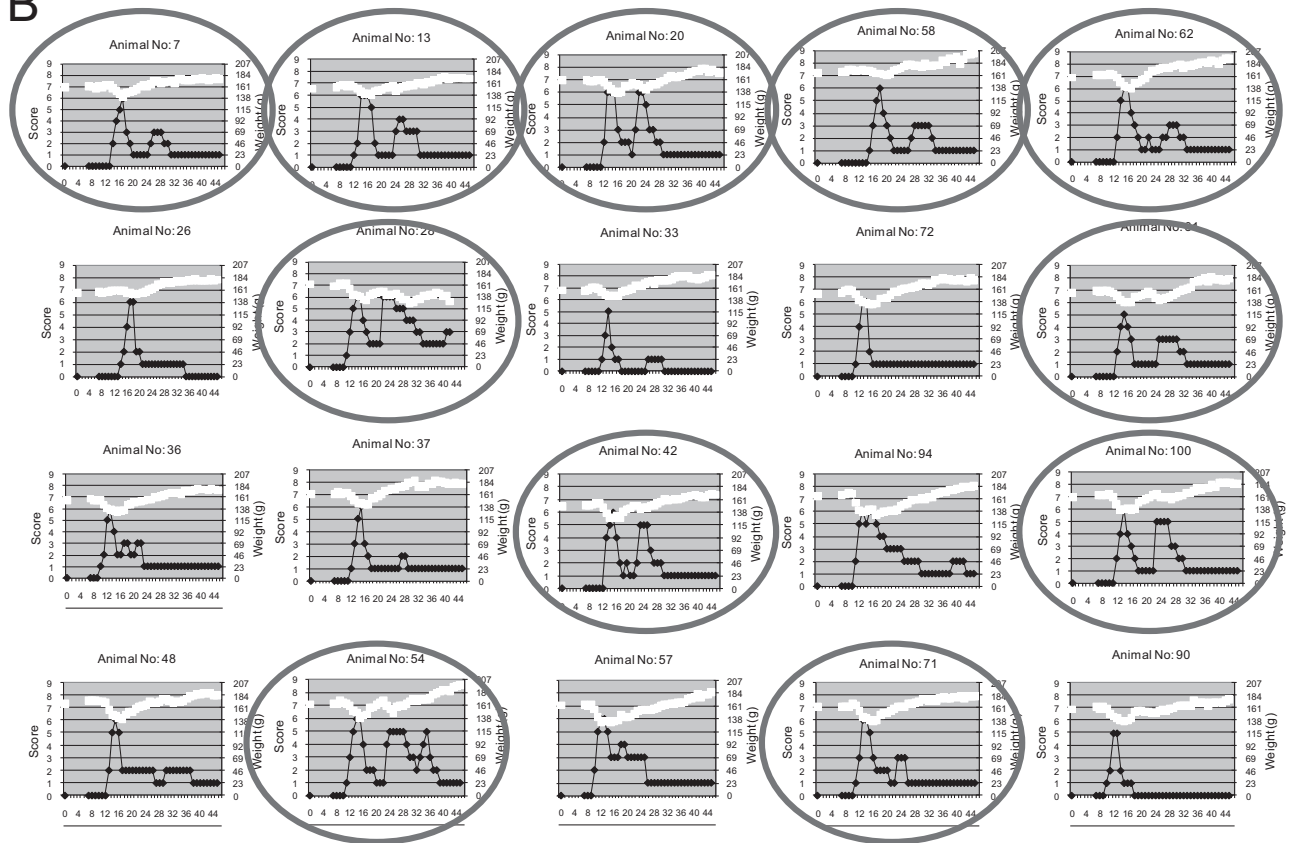

Fig. 56. (Continued)
